# Supplementary material
Source: MDPI journal article supplement (https://www.mdpi.com/2674-1164/1/2/12)
Supplement: s1 [file s1]

Supplemental Table S1. Summary statistics VetScan2. Blood parameters data from 238 turkeys, between 1-7 days old (brooding) and from 2 to 12 weeks of age (growing).

|                      |        | AST               | BA     | CK                | UA                | Glu               | tCa               | P                 | K             | Na                | TP                | Alb               | Glob   |
|----------------------|--------|-------------------|--------|-------------------|-------------------|-------------------|-------------------|-------------------|---------------|-------------------|-------------------|-------------------|--------|
| Brooding             | Mean   | 184.1             | 20.7   | 506.3             | 4.52              | 266.1             | 10.40             | 5.80              | 4.42          | 143.2             | 2.82              | 1.50              | 1.33   |
|                      | SD     | 33.7              | 21.2   | 386.3             | 2.28              | 41.7              | 0.99              | 1.88              | 1.09          | 3.1               | 0.29              | 0.23              | 0.3    |
|                      | Median | 185.0             | 19.0   | 340.0             | 4.00              | 264.0             | 10.40             | 6.00              | 4.50          | 143.0             | 2.80              | 1.50              | 1.3    |
|                      | n      | 117               | 117    | 117               | 117               | 117               | 117               | 117               | 117           | 117               | 117               | 117               | 117    |
| Growing              | Mean   | 218.1             | 13.9   | 1277.4            | 3.27              | 281.0             | 11.48             | 7.51              | 4.9           | 141.0             | 3.23              | 1.95              | 1.28   |
|                      | SD     | 50.3              | 11.5   | 1163.9            | 1.49              | 22.7              | 0.55              | 1.10              | 0.889         | 3.9               | 0.37              | 0.24              | 0.29   |
|                      | Median | 222.0             | 12.0   | 944.9             | 3.00              | 276.5             | 11.40             | 7.80              | 5.0           | 147.0             | 3.20              | 2.000             | 1.20   |
|                      | n      | 117               | 47     | 117               | 117               | 116               | 117               | 117               | 117           | 117               | 117               | 117               | 117    |
| p-value <sup>1</sup> |        | <i>&lt;0.0001</i> | 0.0933 | <i>&lt;0.0001</i> | <i>&lt;0.0001</i> | <i>&lt;0.0001</i> | <i>&lt;0.0001</i> | <i>&lt;0.0001</i> | <i>0.0003</i> | <i>&lt;0.0001</i> | <i>&lt;0.0001</i> | <i>&lt;0.0001</i> | 0.0536 |

<sup>1</sup> p-values in italics indicate significant differences in the mean value of the analyte.  $\alpha=0.05$
